# Supplementary material for: Proinflammatory mucosal-associated invariant CD8+ T cells react to gut flora yeasts and infiltrate multiple sclerosis brain
Source: PubMed Central journal article supplement (PMC9376942; doi:10.3389/fimmu.2022.890298), 2022-07-28
Supplement: DataSheet_1.pdf [file DataSheet_1.pdf]

**Tab. 1**

| Species                             | n. isolates |     |                        |                        | n. subjects |    | Abundance value correction |       |
|-------------------------------------|-------------|-----|------------------------|------------------------|-------------|----|----------------------------|-------|
|                                     | MS          | HD  | % on total MS isolates | % on total HD isolates | MS          | HD | MS                         | HD    |
| <i>Candida albicans</i>             | 388         | 30  | 24.1%                  | 7.7%                   | 9           | 7  | 124.71                     | 14.00 |
| <i>Candida parapsilosis</i>         | 196         | 19  | 12.2%                  | 4.8%                   | 4           | 4  | 28.00                      | 5.07  |
| <i>Saccharomyces delbrueckii</i>    | 185         | 2   | 11.5%                  | 0.5%                   | 2           | 2  | 13.21                      | 0.27  |
| <i>Saccharomyces cerevisiae</i>     | 99          | 1   | 6.2%                   | 0.3%                   | 3           | 1  | 10.61                      | 0.07  |
| <i>Pichia membranifaciens</i>       | 200         | 0   | 12.4%                  | 0.0%                   | 1           | 0  | 7.14                       | 0.00  |
| <i>Exophiala dermatitidis</i>       | 76          | 50  | 4.7%                   | 12.8%                  | 2           | 1  | 5.43                       | 3.33  |
| <i>Candida zeylanoides</i>          | 123         | 0   | 7.6%                   | 0.0%                   | 1           | 0  | 4.39                       | 0.00  |
| <i>Aspergillus pseudoglaucus</i>    | 15          | 55  | 0.9%                   | 14.0%                  | 7           | 1  | 3.75                       | 3.67  |
| <i>Candida glabrata</i>             | 84          | 1   | 5.2%                   | 0.3%                   | 1           | 1  | 3.00                       | 0.07  |
| <i>Exophiala phaeomuriformis</i>    | 73          | 0   | 4.5%                   | 0.0%                   | 1           | 0  | 2.61                       | 0.00  |
| <i>Pichia manshurica</i>            | 70          | 12  | 4.4%                   | 3.1%                   | 1           | 2  | 2.50                       | 1.60  |
| <i>Rhodotorula mucilaginosa</i>     | 8           | 15  | 0.5%                   | 3.8%                   | 6           | 3  | 1.71                       | 3.00  |
| <i>Penicillium commune</i>          | 11          | 0   | 0.7%                   | 0.0%                   | 4           | 0  | 1.57                       | 0.00  |
| <i>Aspergillus ruber</i>            | 19          | 0   | 1.2%                   | 0.0%                   | 2           | 0  | 1.36                       | 0.00  |
| <i>Galactomyces candidum</i>        | 16          | 199 | 1.0%                   | 50.8%                  | 1           | 1  | 0.57                       | 13.27 |
| <i>Trichosporon sp</i>              | 12          | 0   | 0.7%                   | 0.0%                   | 1           | 0  | 0.43                       | 0.00  |
| <i>Aspergillus terreus</i>          | 2           | 1   | 0.1%                   | 0.3%                   | 2           | 1  | 0.14                       | 0.07  |
| <i>Corynascus sepedonium</i>        | 4           | 0   | 0.2%                   | 0.0%                   | 1           | 0  | 0.14                       | 0.00  |
| <i>Pichia fermentans</i>            | 3           | 0   | 0.2%                   | 0.0%                   | 1           | 0  | 0.11                       | 0.00  |
| <i>Pyrenochaeta unguis hominis</i>  | 3           | 0   | 0.2%                   | 0.0%                   | 1           | 0  | 0.11                       | 0.00  |
| <i>Pichia kudriavzevii</i>          | 2           | 0   | 0.1%                   | 0.0%                   | 1           | 0  | 0.07                       | 0.00  |
| <i>Candida orthopsilosis</i>        | 1           | 0   | 0.1%                   | 0.0%                   | 1           | 0  | 0.04                       | 0.00  |
| <i>Chaetomium brasiliense</i>       | 1           | 0   | 0.1%                   | 0.0%                   | 1           | 0  | 0.04                       | 0.00  |
| <i>Chaetomium globosum</i>          | 1           | 0   | 0.1%                   | 0.0%                   | 1           | 0  | 0.04                       | 0.00  |
| <i>Cryptococcus albidus</i>         | 1           | 0   | 0.1%                   | 0.0%                   | 1           | 0  | 0.04                       | 0.00  |
| <i>Cryptococcus diffluens</i>       | 1           | 0   | 0.1%                   | 0.0%                   | 1           | 0  | 0.04                       | 0.00  |
| <i>Dipodascaceae family isolate</i> | 1           | 0   | 0.1%                   | 0.0%                   | 1           | 0  | 0.04                       | 0.00  |

|                                      |             |            |      |      |   |   |      |      |
|--------------------------------------|-------------|------------|------|------|---|---|------|------|
| <i>Geotrichum candidum</i>           | 1           | 0          | 0.1% | 0.0% | 1 | 0 | 0.04 | 0.00 |
| <i>Malassezia globosa</i>            | 1           | 0          | 0.1% | 0.0% | 1 | 0 | 0.04 | 0.00 |
| <i>Penicillium carneum</i>           | 1           | 0          | 0.1% | 0.0% | 1 | 0 | 0.04 | 0.00 |
| <i>Penicillium chrysogenum</i>       | 1           | 0          | 0.1% | 0.0% | 1 | 0 | 0.04 | 0.00 |
| <i>Penicillium echinulatum</i>       | 1           | 0          | 0.1% | 0.0% | 1 | 0 | 0.04 | 0.00 |
| <i>Penicillium expansum</i>          | 1           | 0          | 0.1% | 0.0% | 1 | 0 | 0.04 | 0.00 |
| <i>Penicillium infrapurpureum</i>    | 1           | 0          | 0.1% | 0.0% | 1 | 0 | 0.04 | 0.00 |
| <i>Phoma sp</i>                      | 1           | 0          | 0.1% | 0.0% | 1 | 0 | 0.04 | 0.00 |
| <i>Talaromyces stollii</i>           | 1           | 0          | 0.1% | 0.0% | 1 | 0 | 0.04 | 0.00 |
| <i>Thelebolus ellipsoideus</i>       | 1           | 0          | 0.1% | 0.0% | 1 | 0 | 0.04 | 0.00 |
| <i>Thielavia sp</i>                  | 1           | 0          | 0.1% | 0.0% | 1 | 0 | 0.04 | 0.00 |
| <i>Trichosporon ovoides</i>          | 1           | 0          | 0.1% | 0.0% | 1 | 0 | 0.04 | 0.00 |
| <i>Wickerhamomyces anomalus</i>      | 1           | 0          | 0.1% | 0.0% | 1 | 0 | 0.04 | 0.00 |
| <i>Candida lusitaniae</i>            | 0           | 1          | 0.0% | 0.3% | 0 | 1 | 0.00 | 0.07 |
| <i>Debaryomyces hansenii</i>         | 0           | 1          | 0.0% | 0.3% | 0 | 1 | 0.00 | 0.07 |
| <i>Pichia kluyveri</i>               | 0           | 1          | 0.0% | 0.3% | 0 | 1 | 0.00 | 0.07 |
| <i>Rhizopus oryzae</i>               | 0           | 1          | 0.0% | 0.3% | 0 | 1 | 0.00 | 0.07 |
| <i>Rhodospiridium kratochvilovae</i> | 0           | 2          | 0.0% | 0.5% | 0 | 2 | 0.00 | 0.27 |
| <i>Trichosporon guehoae</i>          | 0           | 1          | 0.0% | 0.3% | 0 | 2 | 0.00 | 0.13 |
| <b>Total n. isolates</b>             | <b>1608</b> | <b>392</b> |      |      |   |   |      |      |

**Tab. 2**

| ID strain             | Identification by ITS1-4 Sanger sequencing | Growth at supra optimal temperatures |      | Hyphal and pseudo-hyphal formation |      |      |      | Sporulation | Invasiveness | Oxidative stress (resistance) |
|-----------------------|--------------------------------------------|--------------------------------------|------|------------------------------------|------|------|------|-------------|--------------|-------------------------------|
|                       |                                            | 40°C                                 | 42°C | YNB                                |      | YPD  |      |             |              |                               |
|                       |                                            |                                      |      | 27°C                               | 37°C | 27°C | 37°C |             |              |                               |
| #17 YMS24-1           | <i>C. parapsilosis</i>                     | ++                                   | ++   | -                                  | -    | -    | -    | -           | +++          | +++                           |
| <b>#106 YMS102-11</b> | <b><i>C.albicans</i></b>                   | ++                                   | ++   | -                                  | +    | -    | +    | -           | +++          | +++                           |
| #128 YMS12-3          | <i>C.albicans</i>                          | ++                                   | ++   | -                                  | -    | -    | -    | -           | +++          | ++                            |
| #18 YMS24-2           | <i>C.albicans</i>                          | ++                                   | ++   | -                                  | -    | -    | -    | -           | -            | -                             |
| #25 YMS25-7           | <i>C.albicans</i>                          | ++                                   | ++   | +                                  | -    | +    |      | -           | -            | +++                           |
| #32 YMS25-14          | <i>C.albicans</i>                          | ++                                   | ++   | -                                  | +    | -    | +    | -           | +++          | +                             |
| #38 YMS25-20          | <i>C.albicans</i>                          | ++                                   | ++   | -                                  | +    | -    | +    | -           | +++          | +++                           |
| <b>#45 YMS25-27</b>   | <b><i>C.albicans</i></b>                   | ++                                   | ++   | -                                  | -    | -    | -    | -           | -            | +                             |
| #51 YMS27-5           | <i>C.albicans</i>                          | ++                                   | ++   | -                                  | -    | -    | -    | -           | -            | +++                           |
| #6 YMS19-6            | <i>C.albicans</i>                          | ++                                   | ++   | -                                  | -    | -    | -    | ++          | -            | ++                            |
| #63 YMS28-7           | <i>Cryptococcus albidus</i>                | -                                    | -    | -                                  | -    | -    | -    | -           | -            | +                             |
| #120 YSM-8-2          | <i>Debaryomyces hansenii</i>               | ++                                   | ++   | -                                  | -    | -    | -    | -           | -            | +++                           |
| #119 YSM-8-1          | <i>Pichia Kluyveri</i>                     | ++                                   | ++   | -                                  | -    | -    | -    | -           | -            | +++                           |
| <b>#2 YMS19-2</b>     | <b><i>S.cerevisiae</i></b>                 | ++                                   | ++   | -                                  | -    | -    | -    | ++          | -            | ++                            |
| #3 YMS19-3            | <i>S.cerevisiae</i>                        | ++                                   | ++   | -                                  | +    | -    | +    | ++          | -            | +                             |
| <b>#12 YMS20-2</b>    | <b><i>S.cerevisiae</i></b>                 | +                                    | -    | -                                  | -    | -    | -    | -           | ++           | +                             |
| #13 YMS20-3           | <i>S.cerevisiae</i>                        | ++                                   | ++   | -                                  | -    | -    | -    | -           | -            | -                             |
| #14 YMS20-4           | <i>S.cerevisiae</i>                        | ++                                   | ++   | -                                  | -    | -    | -    | ++          | +            | +++                           |
| #136 YMS18-1          | <i>S.cerevisiae</i>                        | ++                                   | ++   | -                                  | -    | -    | -    | ++          | +            | -                             |
| #113 YMS7-1           | <i>T.delbrueckii</i>                       | +                                    | -    | -                                  | -    | -    | -    | -           | +            | ++                            |
| #114 YMS7-2           | <i>T.delbrueckii</i>                       | ++                                   | ++   | -                                  | -    | -    | -    | -           | -            | ++                            |
| #117 YMS7-5           | <i>T.delbrueckii</i>                       | ++                                   | ++   | +                                  | -    | +    | -    | ++          | -            | +++                           |
| #118 YMS7-6           | <i>T.delbrueckii</i>                       | ++                                   | ++   | -                                  | -    | -    | -    | -           | -            | +++                           |
| #115 YMS7-3           | <i>T.ovooides</i>                          | ++                                   | ++   | +                                  | +    | +    | +    | -           | +++          | +++                           |
| #111 YMS1-1           | <i>Trichosporon sp</i>                     | ++                                   | ++   | -                                  | +    | +    | +    | -           | +++          | ++                            |
